# Supplementary material for: Concurrent validity of an immersive virtual reality version of the Box and Block Test to assess manual dexterity among patients with stroke
Source: Springer Nature journal article supplement (doi:10.1186/s12984-022-00981-0), 2022-01-22

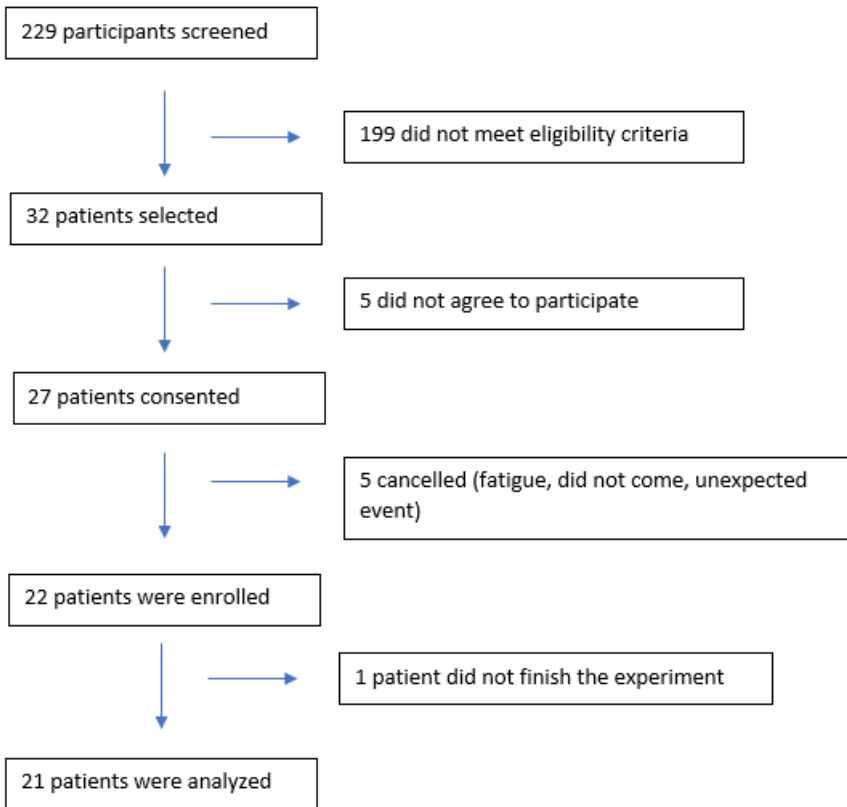

Supplement: 12984_2022_981_MOESM3_ESM.pdf [file 12984_2022_981_MOESM3_ESM.pdf]
